# Supplementary material for: Meta-analysis of secure randomised controlled trials of β-blockade to prevent perioperative death in non-cardiac surgery
Source: PubMed Central journal article supplement — Heart. 2013 Jul 31;100(6):456–64. doi: 10.1136/heartjnl-2013-304262 (PMC3932762; doi:10.1136/heartjnl-2013-304262), 2013-07-31

## APPENDIX 1

Medline Search terms:

("β adrenergic blockers" OR "adrenergic β antagonist" OR "β blockers" OR "beta blockers" OR "adrenergic beta antagonist" OR "beta adrenergic blocker" OR "bisoprolol" OR "metoprolol" OR "atenolol" OR "carvidolol" OR "esmolol") AND ("perioperative" OR "preoperative" OR "intraoperative") AND ("randomized controlled trial"[pt] OR "controlled clinical trial"[pt] OR "randomized"[tiab] OR "placebo"[tiab] OR "clinical trials as topic"[mesh: noexp] OR "randomly"[tiab] OR "trial"[ti]) NOT ("animals"[mh] NOT "humans"[mh])

## APPENDIX 2

Summary of literature search and reasons for excluding studies.

| Study Reference                                                    | Pass at abstract screen | Pass at fulltext screen | Why was study excluded?                                     |
|--------------------------------------------------------------------|-------------------------|-------------------------|-------------------------------------------------------------|
| <b>Goma <i>Middle East J Anesthesiol.</i> 2012;21(4):599-604</b>   | No                      | No                      | Not a RCT on b blocker v control                            |
| Amr <i>Saudi J Anaesth.</i> 2012;6(3):263-7                        | No                      | No                      | Pre medication only                                         |
| Hwang <i>J Clin Anesth.</i> 2013;(1):36-41                         | No                      | No                      | On opioid or anaesthetic requirements                       |
| Balik. <i>Wein Klin Wochenschr.</i> 2012;124(15-16):552-6          | No                      | No                      | Not a RCT on b blocker v control                            |
| Angeloni <i>Ann Thorac Surg.</i> 2012 Oct                          | No                      | No                      | Cardiac surgery                                             |
| Chopra <i>Am J Med.</i> 2012;125(10):953-5                         | No                      | No                      | Review                                                      |
| Wijesundera <i>Circ Cardiovasc Qual Outcomes.</i> 2012;5(4):558-65 | No                      | No                      | prescribing habits                                          |
| Landoni <i>J Cardiothorac Vasc Anesth.</i> 2012;26(5):764-72       | No                      | No                      | Review                                                      |
| Leslie <i>Anaesth Intensive Care</i> 2012;40(2):319-27             | No                      | No                      | Prescribing habits                                          |
| Lopez Alvarez <i>Can J Anaesth.</i> 2012;59(5):442-8               | No                      | No                      | On opioid or anaesthetic requirements                       |
| Deangelis <i>J Orthop Trauma.</i> 2012;26(3):135-40                | No                      | No                      | Not a RCT on b blocker v control                            |
| Shen <i>Am J Rhinol Allergy</i> 2011;25(6):208-11                  | No                      | No                      | Intraoperative medication only                              |
| Flynn <i>Br J Anaesth.</i> 2011;107 Suppl 1:i3-15                  | No                      | No                      | Review                                                      |
| Moon <i>J Int Med Res.</i> 2011;39(5):1861-9                       | No                      | No                      | On opioid or anaesthetic requirements                       |
| Mairesse <i>J Mal Vasc.</i> 2011;36(6):339-47                      | No                      | No                      | Review                                                      |
| Amr <i>J Clin Anesth.</i> 2011;23(7):544-8                         | No                      | No                      | Pre and intraoperatively only                               |
| Drover <i>J Clin Monit Comput.</i> 2011;25(3):175-81               | No                      | No                      | Not a RCT of beta blocker vs control                        |
| Benedetto <i>J Cardiovasc Med.</i> 2013;14(2):104-9.               | No                      | No                      | Review                                                      |
| Kesimci <i>Eur Arch Otorhinolaryngol.</i> 2012;269(1):165-9        | No                      | No                      | Not a RCT of beta blocker vs control (about ganglion block) |
| Gupta <i>Indian J Anaesth.</i> 2011;55(2):135-40.                  | No                      | No                      | Pre medication only                                         |
| Brinkman <i>Ann Thorac Surg.</i> 2011;92(3):788-95                 | No                      | No                      | Cardiac surgery                                             |

|                                                                    |     |     |                                                   |
|--------------------------------------------------------------------|-----|-----|---------------------------------------------------|
| Bakker <i>Eur J Vasc Endovasc Surg.</i> 2011;42(3):317-23          | No  | No  | Study design                                      |
| Angeli <i>Expert Opin Drug Saf.</i> 2011;10(4):491-8               | No  | No  | Review                                            |
| Halonen <i>Expert Opin Drug Saf.</i> 2011 Jul;10(4):491-8          | No  | No  | Cardiac surgery                                   |
| Yu <i>Anesth Analg.</i> 2011;112(2):267-81                         | No  | No  | Review                                            |
| Flu <i>J Am Coll Cardiol.</i> 2010;56(23):1922-9                   | No  | No  | No placebo group                                  |
| Lee <i>Korean J Anesthesiol.</i> 2010 ;59(3):179-84.               | No  | No  | On opioid or anaesthetic requirements             |
| Mastracci <i>Can J Surg.</i> 2010;53(5):342-4                      | Yes | No  | Duplicate                                         |
| Badgett <i>Anesthesiology.</i> 2010;113(3):585-92                  | No  | No  | Review                                            |
| Angeli <i>Am J Cardiovasc Drugs.</i> 2010;10(4):247-59             | No  | No  | Review                                            |
| Tisdale <i>J Thorac Cardiovasc Surg.</i> 2010;140(1):45-51         | No  | No  | Not a RCT of beta blocker vs control              |
| Leibowitz <i>J Cardiothorac Vasc Anesth.</i> 2010;24(2):217-8      | No  | No  | Review                                            |
| Angeli <i>Ther Adv Cardiovasc Dis.</i> 2010;4(2):109-18            | No  | No  | Review                                            |
| Chopra <i>JAMA.</i> 2010;303(6):551-2                              | No  | No  | Review                                            |
| Van Lier <i>Ther Adv Cardiovasc Dis.</i> 2010;4(2):109-18          | No  | No  | Review                                            |
| Ragab <i>Otolaryngol Head Neck Surg.</i> 2010;142(1):48-54         | No  | No  | Children                                          |
| Poldermans <i>Cleve Clin J Med.</i> 2009;76 Suppl 4:S84-92         | No  | No  | Review                                            |
| Landoni <i>J Cardiothorac Vasc Anesth.</i> 2010;24(2):219-29       | No  | No  | Review                                            |
| Rajeev <i>Curr Drug Targets.</i> 2009;10(9):833-41                 | No  | No  | Review                                            |
| Domanski <i>J Cardiovasc Pharmacol Ther.</i> 2009;14(4):258-68     | No  | No  | Review                                            |
| Katznelson <i>Can J Anaesth.</i> 2009;56(11):793-801               | No  | No  | Not a RCT                                         |
| Tisdale <i>Ann Thorac Surg.</i> 2009;88(3):886-93                  | No  | No  | Not a RCT of beta blocker vs control (amiodarone) |
| Landoni <i>Curr Drug Targets.</i> 2009;10(9):858-62.               | No  | No  | On opioid or anaesthetic requirements             |
| Talati <i>Ann Pharmacother.</i> 2009;43(7):1181-8                  | No  | No  | Review                                            |
| Gokce <i>Saudi Med J.</i> 2009;30(6):771-7                         | No  | No  | On opioid or anaesthetic requirements             |
| Dunkelgrun <i>Ann Surg.</i> 2009;249(6):921-6                      | Yes | Yes |                                                   |
| McNeely <i>J Clin Anesth.</i> 2009 May;21(3):233-4                 | No  | No  | Review                                            |
| Marik <i>J Clin Anesth.</i> 2009 May;21(3):220-9                   | No  | No  | Review                                            |
| Flu <i>Expert Rev Cardiovasc Ther.</i> 2009;7(5):521-32            | No  | No  | Review                                            |
| Priebe <i>Minerva Anesthesiol.</i> 2009;75(5):319-23               | No  | No  | Review                                            |
| Iliuta <i>Interact Cardiovasc Thorac Surg.</i> 2009;9(1):89-93     | No  | No  | Cardiac surgery                                   |
| Suttner <i>Br J Anaesth.</i> 2009;102(5):597-607                   | No  | No  | Retracted                                         |
| Marik <i>J Crit Care.</i> 2009 Sep;24(3):458-63                    | No  | No  | Not a RCT of beta blockers                        |
| Zangrillo <i>J Cardiothorac Vasc Anesth.</i> 2009 Oct;23(5):625-32 | No  | No  | Review                                            |
| Alonso Coello <i>Pol Arch Med Wewn.</i> 2008;118(11):616-8         | No  | No  | Review                                            |
| Tanabe <i>Eur J Anaesthesiol.</i> 2009;26(1):39-42                 | No  | No  | On opioid or anaesthetic requirements             |
| Priebe <i>Minerva Anesthesiol.</i> 2009;75(5):319-23               | No  | No  | Review                                            |
| Feringa <i>Ned Tijdschr Geneeskd.</i> 2008;152(48):2606-11         | No  | No  | Review                                            |
| Hepner <i>J Clin Anesth.</i> 2008;20(8):580-8                      | No  | No  | Review                                            |
| Tabbutte <i>J Thorac Cardiovasc Surg.</i> 2008;136(5):1229-36      | No  | No  | Children                                          |

|                                                                  |     |     |                                          |
|------------------------------------------------------------------|-----|-----|------------------------------------------|
| Elahi <i>Eur J Cardiovasc Prev Rehabil.</i> 2008;15(6):735-41    | No  | No  | Review                                   |
| Yang XY <i>Zhonghua Yi Xue Za Zhi.</i> 2008;88(21):1476-80.      | Yes | Yes |                                          |
| Adibi <i>Lancet.</i> 2008;372(9644):1147                         | No  | No  | Study design                             |
| Bhagat <i>Anesth Analg.</i> 2008;107(4):1348-55                  | No  | No  | Not a RCT on b blocker v control         |
| Kushakovsky <i>Crit Care.</i> 2008;12(4):172                     | No  | No  | Review                                   |
| Sleilaty <i>Int J Cardiol.</i> 2009 Oct 2;137(2):116-22          | No  | No  | Cardiac surgery                          |
| Petzoldt <i>Anaesthesist.</i> 2008;57(7):655-69                  | No  | No  | Review                                   |
| Cesaneck <i>Ann Vasc Surg.</i> 2008;22(5):643-8                  | No  | No  | Not a RCT of beta blocker vs control     |
| Ghosh <i>J Anesth.</i> 2008;22(2):131-4                          | No  | No  | On opioid or anaesthetic requirements    |
| Vernick <i>Best Pract Res Clin Anaesthesiol.</i> 2008;22(1):1-21 | No  | No  | Review                                   |
| Devereaux <i>Lancet.</i> 2008;371(9627):1839-47                  | Yes | Yes |                                          |
| Fleischer <i>Lancet.</i> 2008;371(9627):1813-4                   | No  | No  | Review                                   |
| Schanzer <i>J Vasc Surg.</i> 2008;47(4):774-781                  | No  | No  | Not a RCT of beta blockers vs control    |
| Beattie <i>Anesth Analg.</i> 2008;106(4):1039-48                 | No  | No  | Review                                   |
| London <i>Anesth Analg.</i> 2008;106(4):1025-30                  | No  | No  | Review                                   |
| Lertsburapa <i>J Thorac Cardiovasc Surg.</i> 2008;135(2):405-11  | No  | No  | Review                                   |
| Howard <i>Ann Pharmacother.</i> 2008;42(2):253-8                 | No  | No  | Review                                   |
| Daumerie <i>Curr Opin Anaesthesiol.</i> 2008;21(1):60-5          | No  | No  | Review                                   |
| Avilo <i>Rev Bras Cir Cardiovasc.</i> 2007;22(3):332-40          | No  | No  | Cardiac surgery                          |
| Ozturk <i>Br J Anaesth.</i> 2008;100(2):211-4                    | No  | No  | On opioid or anaesthetic requirements    |
| Sun <i>Am Heart J.</i> 2007;154(6):1021-8                        | No  | No  | Review                                   |
| Fleischer <i>Curr Opin Anaesthesiol.</i> 2007;20(6):526-30       | No  | No  | Review                                   |
| Collard <i>Anesth Analg.</i> 2007;105(5):1255-62                 | No  | No  | On opioid or anaesthetic requirements    |
| Anglade <i>Curr Med Res Opin.</i> 2007;23(11):2849-55.           | No  | No  | Not a RCT                                |
| Walsh <i>Br J Anaesth.</i> 2007;99(5):611-6                      | No  | No  | Review                                   |
| Celebi <i>Saudi Med J.</i> 2007;28(9):1357-61                    | No  | No  | Not a RCT of beta blocker vs control     |
| Haghjoo <i>Heart Rhythm.</i> 2007;4(9):1170-4                    | No  | No  | Cardiac surgery                          |
| Filion <i>Am Heart J.</i> 2007;154(3):407-14                     | No  | No  | Cardiac surgery                          |
| Zeng Nan <i>Fang Yi Ke Da Xue Xue Bao.</i> 2007;27(8):1221-3     | No  | No  | On opioid or anaesthetic requirements    |
| Selimoglu <i>Heart Surg Forum.</i> 2007;10(4):E309-14            | No  | No  | Cardiac surgery                          |
| Zaugg <i>Anesthesiology.</i> 2007;107(1):33-44                   | Yes | Yes |                                          |
| Ellis <i>J Cardiothorac Vasc Anesth.</i> 2007;21(3):330-6        | No  | No  | Looked at prescribing habits             |
| Acikel <i>Int J Cardiol.</i> 2008;126(1):108-13.                 | No  | No  | Cardiac surgery                          |
| Poldermans <i>J Am Coll Cardiol.</i> 2007;49(17):1763-9          | No  | No  | Not an RCT of beta blockers vs control   |
| Wijeyesundera <i>Am Heart J.</i> 2007;153(5):e17                 | No  | No  | Review                                   |
| Louizos <i>Ann Otol Rhinol Laryngol.</i> 2007;116(2):107-11      | No  | No  | Pre medication only                      |
| Baker <i>Ann Pharmacother.</i> 2007;41(4):587-98.                | No  | No  | Cardiac surgery                          |
| Ahonen <i>Br J Anaesth.</i> 2007;98(4):456-61                    | No  | No  | On opioid or anaesthetic requirements    |
| Butte <i>Anaesthesist.</i> 2007;56(3):285-96                     | No  | No  | Review                                   |
| Kovac <i>J Cardiothorac Vasc Anesth.</i> 2007;21(1):45-50        | No  | No  | Not a RCT of beta-blocker versus control |
| Mengistu <i>Eur J Anaesthesiol.</i> 2007;24(6):529-34            | No  | No  | Retracted                                |
| Pikto-Pietkiewicz <i>Kardiologia Pol.</i> 2006;64(9):1028-       | No  | No  | Not a RCT                                |

|                                                                      |     |     |                                                                    |
|----------------------------------------------------------------------|-----|-----|--------------------------------------------------------------------|
| 30                                                                   |     |     |                                                                    |
| Wiesbauer <i>Anesth Analg.</i> 2007 Jan;104(1):27-41                 | No  | No  | Review                                                             |
| Albaladejo <i>Presse Med.</i> 2006;35(11 Pt 2):1697-702              | No  | No  | Review                                                             |
| Yang <i>Am Heart J.</i> 2006;152(5):983-90.                          | Yes | Yes |                                                                    |
| Werner <i>Int J Clin Pharmacol Ther.</i> 2006;44(9):397-400          | No  | No  | Review                                                             |
| Poldermans <i>J Am Coll Cardiol.</i> 2006;48(5):964-9                | No  | No  | Not a RCT of beta blockers vs control                              |
| Shilling <i>J Am Coll Cardiol.</i> 2006;48(5):964-9                  | No  | No  | Review                                                             |
| Devereaux <i>Am Heart J.</i> 2006;152(2):223-30.                     | No  | No  | Study design                                                       |
| Behmanesh <i>Curr Med Res Opin.</i> 2006;22(8):1443-50.              | No  | No  | Cardiac surgery                                                    |
| Juul <i>BMJ.</i> 2006;332(7556):1482                                 | Yes | Yes |                                                                    |
| Kemp <i>AANA J.</i> 2006;74(3):227-32.                               | No  | No  | Review                                                             |
| Raghunathan <i>J Vasc Surg.</i> 2006;43(6):1175-82                   | No  | No  | Not a RCT of beta blockers vs control (coronary revascularisation) |
| Neary <i>Surgeon.</i> 2006;4(3):139-43                               | Yes | Yes |                                                                    |
| Hanada <i>Curr Opin Anaesthesiol.</i> 2006;19(3):315-9               | No  | No  | Review                                                             |
| Liu <i>Zhong Nan Da Xue Xue Bao Yi Xue Ban.</i> 2006;31(2):249-53    | No  | No  | Pre and intraoperatively only                                      |
| Lai <i>Ai Zheng.</i> 2006;25(5):609-13                               | Yes | No  | Only followed for 3 days                                           |
| Chung <i>J Formos Med Assoc.</i> 2006;105(3):189-93.                 | No  | No  | Pre medication only                                                |
| Mackey <i>J Vasc Surg.</i> 2006;43(3):533-8                          | No  | No  | Review                                                             |
| Gillespie <i>Clin Ther.</i> 2005;27(12):1963-9                       | No  | No  | Cardiac surgery                                                    |
| Schipke <i>Eur J Cardiothorac Surg.</i> 2006;29(4):479-85            | No  | No  | Review                                                             |
| Valjus <i>Acta Anaesthesiol Scand.</i> 2006;50(1):32-9.              | No  | No  | On opioid or anaesthetic requirements                              |
| Cruz <i>Rev Esp Anesthesiol Reanim.</i> 2005;52(10):617-26           | No  | No  | Review                                                             |
| Mitchell <i>JAMA.</i> 2005;294(24):3093-100.                         | No  | No  | Cardiac surgery                                                    |
| Maggio <i>Surg Clin North Am.</i> 2005;85(6):1091-102                | No  | No  | Review                                                             |
| Schouten <i>J Vasc Surg.</i> 2005;42(4):825                          | No  | No  | Review                                                             |
| Salpeter <i>Cochrane Database Syst Rev.</i> 2005;(4):CD003566.       | No  | No  | Effect in COPD                                                     |
| Nette <i>Naunyn Schmiedebergs Arch Pharmacol.</i> 2005;372(2):115-24 | No  | No  | Cardiac surgery                                                    |
| Schwartz <i>J Cardiovasc Pharmacol Ther.</i> 2005;10(3):181-90.      | No  | No  | Cardiac surgery                                                    |
| Conte <i>J Vasc Surg.</i> 2005;42(3):456-64                          | No  | No  | Not a RCT of beta blockers vs control                              |
| McGory <i>Surgery.</i> 2005;138(2):171-9                             | No  | No  | Review                                                             |
| Lindenauer <i>N Engl J Med.</i> 2005;353(4):349-61.                  | No  | No  | Not a RCT                                                          |
| Brady <i>J Vasc Surg.</i> 2005;41(4):602-9.                          | Yes | Yes |                                                                    |
| Sedrakyan <i>J Thorac Cardiovasc Surg.</i> 2005;129(5):997-1005      | No  | No  | Review                                                             |
| Ellison <i>Drugs.</i> 2005;65(6):787-97                              | No  | No  | Cardiac surgery                                                    |
| Ferguson <i>Am Heart Hosp J.</i> 2003;1(4):264-72.                   | No  | No  | Review                                                             |
| Alex <i>Ann Thorac Surg.</i> 2005;79(2):517-20                       | No  | No  | Cardiac surgery                                                    |
| Sellden <i>Acta Anaesthesiol Scand.</i> 2005;49(1):35-40             | No  | No  | Cardiac surgery                                                    |
| Boldt <i>Anesth Analg.</i> 2004;99(4):1009-17                        | No  | No  | Cardiac surgery                                                    |
| Chia <i>Br J Anaesth.</i> 2004;93(6):799-805                         | No  | No  | On opioid or anaesthetic requirements                              |
| Reddy <i>Pharmacotherapy.</i> 2004;24(8):1013-9.                     | No  | No  | Cardiac surgery                                                    |

|                                                                                    |    |    |                                       |
|------------------------------------------------------------------------------------|----|----|---------------------------------------|
| Crystal <i>Heart</i> . 2004;90(8):941-2                                            | No | No | Cardiac surgery                       |
| Halkin <i>J Am Coll Cardiol</i> . 2004;43(10):1780-7                               | No | No | Cardiac surgery                       |
| Booth <i>Anesth Analg</i> . 2004;98(5):1224-31                                     | No | No | Cardiac surgery                       |
| Lindenauer <i>Arch Intern Med</i> . 2004;164(7):762-6                              | No | No | Review                                |
| Juul <i>Am Heart J</i> . 2004;147(4):677-83                                        | No | No | Study design                          |
| Bekker <i>J Neurosurg Anesthesiol</i> . 2004;16(2):126-35                          | No | No | Not a RCT on beta blockers            |
| Sanjuan <i>Ann Thorac Surg</i> . 2004;77(3):838-43                                 | No | No | Cardiac surgery                       |
| Arbabi <i>J Trauma</i> . 2004;56(2):265-9                                          | No | No | Not a RCT                             |
| Tauzin-Fin <i>Br J Anaesth</i> . 2004;92(4):512-7                                  | No | No | Not a RCT on beta blocker vs control  |
| Piper <i>Anesthesiol Intensivmed Notfallmed Schmerzther</i> . 2003;38(12):781-6    | No | No | Pre medication only                   |
| White <i>Anesth Analg</i> . 2003;97(6):1633-8                                      | No | No | Intraoperative medication only        |
| Kluger J, White CM. <i>Card Electrophysiol Rev</i> . 2003;7(2):165-7.              | No | No | Cardiac surgery                       |
| Kim Eur <i>J Cardiothorac Surg</i> . 2003;24(5):770-6                              | No | No | Review                                |
| Salpeter <i>Respir Med</i> . 2003;97(10):1094-101                                  | No | No | Effect in COPD                        |
| Bohm <i>Z Kardiol</i> . 2003;92(8):668-76                                          | No | No | Cardiac surgery                       |
| Cardona <i>P R Health Sci J</i> . 2003;22(2):119-23                                | No | No | Cardiac surgery                       |
| Taylor <i>Can J Surg</i> . 2003;46(3):216-22                                       | No | No | Not a RCT                             |
| Shyong <i>J Clin Anesth</i> . 2003;15(3):170-8.                                    | No | No | Not a RCT                             |
| Salpeter <i>Cochrane Database Syst Rev</i> . 2002;(4):CD002992                     | No | No | Effect in COPD                        |
| De Castro <i>Anesth Analg</i> . 2003;96(1):33-8                                    | No | No | On opioid or anaesthetic requirements |
| Tan <i>Anaesthesia</i> . 2002;57(12):1207-12                                       | No | No | Pre medication only                   |
| Yazicioglu <i>Eur J Cardiothorac Surg</i> . 2002;22(3):397-401                     | No | No | Cardiac surgery                       |
| Deng <i>Circ J</i> . 2002;66(8):715-7                                              | No | No | Cardiac surgery                       |
| Salpeter <i>Cochrane Database Syst Rev</i> . 2002;(2):CD003566                     | No | No | Effect in COPD                        |
| Hynynen <i>Duodecim</i> . 2000;116(17):1805-7                                      | No | No | Not RCT                               |
| Auerbach <i>JAMA</i> . 2002;287(11):1435-44                                        | No | No | Review                                |
| Tokmakoglu <i>Eur J Cardiothorac Surg</i> . 2002;21(3):401-5                       | No | No | Cardiac surgery                       |
| Salpeter <i>Cochrane Database Syst Rev</i> . 2002;(1):CD002992                     | No | No | Effect in COPD                        |
| Schmidt <i>Arch Intern Med</i> . 2002;162(1):63-9                                  | No | No | Review                                |
| Reddy <i>Pharmacotherapy</i> . 2002;22(1):75-80                                    | No | No | Cardiac surgery                       |
| Bensky <i>Pharmacotherapy AANA J</i> . 2000;68(5):437-42                           | No | No | Pre medication only                   |
| Van der Maaten <i>J Cardiothorac Vasc Anesth</i> . 2001;15(6):710-6                | No | No | Cardiac surgery                       |
| Salpeter <i>Cochrane Database Syst Rev</i> . 2001;(2):CD002992                     | No | No | Effect in COPD                        |
| Mollhoff <i>Zentralbl Chir</i> . 2001;126(4):312-7                                 | No | No | Review                                |
| Bory <i>Arch Mal Coeur Vaiss</i> . 2000;93 Spec No 4:45-50                         | No | No | Review                                |
| Hynninen <i>Anesth Analg</i> . 2001;92(4):810-6                                    | No | No | Cardiac surgery                       |
| Giri <i>Lancet</i> . 2001;357(9259):830-6                                          | No | No | Cardiac surgery                       |
| Zalunardo <i>Anaesthesist</i> . 2001;50(1):21-5                                    | No | No | Not a RCT of beta blocker vs control  |
| <i>MMW Fortschr Med</i> . 2001;143(1-2):52                                         | No | No | Not a RCT                             |
| Coloma <i>esth Analg</i> . 2001;92(2):352-7                                        | No | No | Not a RCT of beta blocker vs control  |
| Jansson <i>Ann Surg</i> . 2001;233(1):60-4                                         | No | No | Not a RCT                             |
| Apitzsch <i>Anesthesiol Intensivmed Notfallmed Schmerzther</i> . 2000;35(8):515-22 | No | No | Not a RCT of beta blocker             |

|                                                                  |     |     |                                       |
|------------------------------------------------------------------|-----|-----|---------------------------------------|
| Urban <i>Anesth Analg.</i> 2000;90(6):1257-61                    | Yes | No  | Post operative medication only        |
| Chauhan <i>Indian J Med Res.</i> 1999;110:174-7                  | No  | No  | Cardiac surgery                       |
| Solomon <i>Ann Thorac Surg.</i> 2000;69(1):126-9                 | No  | No  | Cardiac surgery                       |
| Zaugg <i>Anesthesiology.</i> 1999;91(6):1674-86                  | Yes | No  | Followed up for 72 hours only         |
| Poldermans <i>N Engl J Med.</i> 1999;341:1789-94                 | Yes | Yes |                                       |
| Harwood <i>J Cardiothorac Vasc Anesth.</i> 1999;13(5):555-61     | No  | No  | No placebo group                      |
| Wenke <i>Z Kardiol.</i> 1999;88(9):647-52                        | No  | No  | Cardiac surgery                       |
| Quaranta <i>Ophthalmology.</i> 1999;106(7):1357-62               | No  | No  | Not a RCT of beta blocker vs control  |
| Van den Berg <i>Eur J Anaesthesiol.</i> 1999;16(3):186-94        | No  | No  | Not a RCT of beta blockers vs control |
| Kuhn-Regnier <i>Eur J Cardiothorac Surg.</i> 1999;15(1):67-74    | No  | No  | Cardiac surgery                       |
| Raby <i>Anesth Analg.</i> 1999;88(3):477-82.                     | Yes | No  | Followed up for 48 hours only         |
| Liguori <i>Anesth Analg.</i> 1998;87(6):1320-5                   | No  | No  | Intraoperative medication only        |
| Avramov <i>Anesth Analg.</i> 1998;87(3):666-70                   | No  | No  | Not an RCT of beta blocker vs control |
| Korpinen <i>Acta Anaesthesiol Belg.</i> 1998;49(2):123-32        | No  | No  | Pre medication only                   |
| Wallace <i>Anesthesiology.</i> 1998;88(1):7-17                   | Yes | No  | duplicate (Mangano)                   |
| Jakobsen <i>Acta Anaesthesiol Scand.</i> 1997 Nov;41(10):1324-30 | No  | No  | Pre medication only                   |
| Jakobsen <i>J Cardiothorac Vasc Anesth.</i> 1997;11(6):746-51    | Yes | No  | Not intention to treat                |
| Ayuso <i>Ann Otol Rhinol Laryngol.</i> 1997;106(10 Pt 1):863-8   | No  | No  | Not an RCT of beta blocker vs control |
| Palda <i>Ann Intern Med.</i> 1997;127(4):313-28                  | No  | No  | Review                                |
| Van den Berg <i>Eur J Anaesthesiol.</i> 1997;14(2):134-47        | No  | No  | Pre medication only                   |
| Gottlieb <i>J Cardiothorac Vasc Anesth.</i> 1997;11(1):67-71     | No  | No  | Not a RCT                             |
| Johansen <i>Anesthesiology.</i> 1997;86(2):364-71                | No  | No  | effect on anaesthetic requirements    |
| Jalonen <i>Anesthesiology.</i> 1997;86(2):331-45                 | No  | No  | Cardiac surgery                       |
| Gandolfi <i>Ophthalmology.</i> 1997;104(2):181-6                 | No  | No  | Not an RCT on beta blockers (5 FU)    |
| Mangano <i>N Engl J Med.</i> 1996;335(23):1713-20                | Yes | Yes |                                       |
| Matsuda <i>J Card Surg.</i> 1996;11(6):411-5                     | No  | No  | Cardiac surgery                       |
| Searle <i>Can J Anaesth.</i> 1996;43(9):890-9                    | No  | No  | Cardiac surgery                       |
| Beggs <i>Best Pract Benchmarking Healthc.</i> 1996;1(4):180-6    | No  | No  | Cardiac surgery                       |
| Podesser <i>J Thorac Cardiovasc Surg.</i> 1995;110(5):1461-9     | No  | No  | Cardiac surgery                       |
| Yeager <i>Arch Surg.</i> 1995;130(8):869-72                      | No  | No  | Not RCT                               |
| Brogden <i>Drugs.</i> 1995;49(4):618-49                          | No  | No  | Review                                |
| Podesser <i>J Cardiovasc Surg.</i> 1994;35(6 Suppl 1):233-5      | No  | No  | Cardiac surgery                       |
| Schaffer <i>Anaesthesist.</i> 1994;43(11):723-9                  | No  | No  | Pre medication only                   |
| Bottiger <i>Anaesthesist.</i> 1994;43(11):699-717                | No  | No  | Review                                |
| Botcher <i>Br J Anaesth.</i> 1994;72(6):633-7                    | No  | No  | Not an RCT on beta blockers (ACEi)    |
| Neustein <i>J Cardiothorac Vasc Anesth.</i> 1994;8(3):273-7      | No  | No  | Cardiac surgery                       |
| Ramsay <i>Anesth Analg.</i> 1994;78(5):867-75                    | No  | No  | Cardiac surgery                       |
| Dorian <i>Can J Cardiol.</i> 1994;10(2):193-200                  | No  | No  | Not a RCT (compared to amiodarone)    |
| De Jong <i>Cardiovasc Drugs Ther.</i> 1993;7(4):677-82           | No  | No  | Cardiac surgery                       |
| Jakobsen <i>Ugeskr Laeger.</i> 1993;155(29):2269-73              | No  | No  | Pre medication only                   |
| Podesser <i>Thorac Cardiovasc Surg.</i> 1993;41(3):173-9         | No  | No  | Cardiac surgery                       |

|                                                                   |     |     |                                                             |
|-------------------------------------------------------------------|-----|-----|-------------------------------------------------------------|
| Jakobsen <i>Ugeskr Laeger</i> . 1993;155(12):877-81               | No  | No  | Not a RCT                                                   |
| Wesslen <i>Ann Thorac Surg</i> . 1992;54(6):1151-8                | No  | No  | Cardiac surgery                                             |
| Kovac <i>J Clin Anesth</i> . 1992;4(4):315-20                     | No  | No  | Pre medication only                                         |
| Singh <i>Can J Anaesth</i> . 1992;39(6):559-62                    | No  | No  | Not a RCT of beta blocker vs control (esmolol vs labetalol) |
| Rieke <i>Anaesthesist</i> . 1991;40(11):644-7                     | No  | No  | Cardiac surgery                                             |
| Cleophas <i>Angiology</i> . 1991;42(10):805-11                    | No  | No  | Pre medication only                                         |
| Marlow <i>Can J Anaesth</i> . 1991;38(7):844-8                    | No  | No  | Not a RCT of beta blocker vs control                        |
| Whirley-Diaz <i>Anaesthesia</i> . 1991;46(3):220-3                | No  | No  | Pre medication only                                         |
| Kharasch <i>Anesth Analg</i> . 1991;72(2):216-20                  | No  | No  | Pre medication only                                         |
| Reves <i>J Thorac Cardiovasc Surg</i> . 1990;100(2):221-7         | No  | No  | Cardiac surgery                                             |
| Kanitz <i>J Clin Anesth</i> . 1990 Jul-Aug;2(4):238-42            | No  | No  | Intraoperative medication only                              |
| Parnass <i>J Clin Anesth</i> . 1990;2(4):232-7                    | No  | No  | Pre medication only                                         |
| Eichwede <i>Anaesthesist</i> . 1990;39(7):361-6                   | No  | No  | Not a RCT                                                   |
| Allberry <i>Can J Anaesth</i> . 1990;37(4 Pt 1):448-51            | No  | No  | Pre medication only                                         |
| Kling <i>Anaesthesist</i> . 1990;39(5):264-8                      | No  | No  | Cardiac surgery                                             |
| Oxorn <i>Can J Anaesth</i> . 1990;37(2):206-9                     | No  | No  | Pre medication only                                         |
| Sheppard <i>Can J Anaesth</i> . 1990;37(2):202-5                  | No  | No  | Pre medication only                                         |
| Mantangi <i>Can J Cardiol</i> . 1989;5(4):229-34                  | No  | No  | Cardiac surgery                                             |
| Jakobsen <i>Anaesthesia</i> . 1989;44(3):249-52                   | No  | No  | Pre medication only                                         |
| Gold <i>Anesth Analg</i> . 1989;68(2):101-4.                      | No  | No  | Intraoperative medication only                              |
| Gombotz <i>Acta Anaesthesiol Scand</i> . 1988;32(8):686-90        | No  | No  | Not a RCT of beta blocker vs control                        |
| West <i>Am J Ophthalmol</i> . 1988;106(2):168-73                  | No  | No  | Pre medication only                                         |
| Stone <i>Anesthesiology</i> . 1988;68(4):495-500                  | No  | No  | Pre medication only                                         |
| Lamb <i>Eur Heart J</i> . 1988;9(1):32-6                          | No  | No  | Cardiac surgery                                             |
| Turlapaty <i>Am Heart J</i> . 1987;114(4 Pt 1):866-85             | No  | No  | Review                                                      |
| Khuri <i>Am J Cardiol</i> . 1987;60(6):51D-58D                    | No  | No  | Cardiac surgery                                             |
| Adlerberth <i>Reviewbolism</i> . 1987;36(7):637-42                | No  | No  | Not a RCT of b blocker vs control                           |
| Simpson <i>Anaesthesia</i> . 1987;42(3):243-8                     | No  | No  | Pre medication only                                         |
| Adlrberth <i>Ann Surg</i> . 1987;205(2):182-8                     | No  | No  | Not a RCT                                                   |
| Magnusson <i>Br J Anaesth</i> . 1986;58:251-60                    | No  | No  | Pre medication only                                         |
| Jakobsen <i>Br J Anaesth</i> . 1986;58(3):261-6                   | No  | No  | Pre medication only                                         |
| Murthy <i>J Clin Pharmacol</i> . 1986;26 Suppl A:A27-A35          | No  | No  | Review                                                      |
| Reves <i>Am J Cardiol</i> . 1985;56(11):57F-62F                   | No  | No  | Review                                                      |
| Gray <i>Am J Cardiol</i> . 1985;56(11):49F-56F                    | No  | No  | Cardiac surgery                                             |
| Mantangi <i>J Thorac Cardiovasc Surg</i> . 1985 Mr;89(3):439-43   | No  | No  | Cardiac surgery                                             |
| Heikkila <i>Acta Anaesthesiol Scand</i> . 1984;28(6):677-82       | No  | No  | Cardiac surgery                                             |
| Hasselgren <i>J Clin Endocrinol metab</i> . 1984;59(5):835-9      | No  | No  | Not RCT of beta block vs control                            |
| Hanna <i>Anaesthesia</i> . 1983;38(12):1192-4                     | No  | No  | Pre medication only                                         |
| Ponten <i>Anesth Analg</i> . 1983;62(4):380-90                    | No  | No  | Cardiac surgery                                             |
| Berggren <i>Scand J Thorac Cardiovasc Surg</i> . 1983;17(1):29-32 | No  | No  | Cardiac surgery                                             |
| Bayliff <i>Ann Thorac Surg</i> . 1999 Jan;67(1):182-6.            | Yes | Yes |                                                             |
| Burns <i>Br J Anaesth</i> . 1988;61:345-46                        | No  | No  | Pre medication only                                         |
| Coleman <i>Anaesthesia</i> 1980; 35:972-78                        | No  | No  | Pre medication only                                         |
| Cucchiara <i>Anesthesiology</i> 1986;65:528-31                    | No  | No  | Pre medication only                                         |
| Davies <i>Anesth Intensive Care</i> 1993;20:161-164               | No  | No  | Pre medication only                                         |
| Gibson <i>Clin Pharmacol Ther</i> 1988;44:650-53                  | No  | No  | Pre medication only                                         |

|                                                                             |    |    |                                       |
|-----------------------------------------------------------------------------|----|----|---------------------------------------|
| Leslie <i>J Clin Anesth</i> 1989;1:194-200                                  | No | No | Pre medication only                   |
| Liu <i>Can Anaesth Soc J</i> 1986;33:556-62                                 | No | No | Pre medication only                   |
| MacKenzie <i>BMJ</i> 1989;298:363-64                                        | No | No | Pre medication only                   |
| Inada <i>J Clin Anesth</i> 1989;1:207-13                                    | No | No | Pre medication only                   |
| Miller <i>Can J Anesth</i> 1991;38:849-58                                   | No | No | Pre medication only                   |
| Rosenburg <i>BMJ</i> 1996;313:258-61                                        | No | No | Pre medication only                   |
| Bohm <i>Z Kardiol</i> 2003;92:668-676                                       | No | No | Not a RCT of beta blocker vs control  |
| Guran <i>Jurnalul Roman de Anestezie Terapie Intensiva</i> 2009;16:93-8     | No | No | On anaesthetic or opioid requirements |
| Sandler <i>J Cardiothorac Anesth</i> 1990;4:44-50                           | No | No | Pre medication only                   |
| Khan <i>Annals of Noninvasive Electrocardiology</i> .2013;18(1):58-68       | No | No | Cardiac Surgery                       |
| Garnock-Jones. <i>Drugs</i> . 2012;72(1):109-32                             | No | No | Review                                |
| Ellenberger. <i>Anesthesiology</i> . 2011;114(4):817-23                     | No | No | Not a RCT of beta blocker vs control  |
| Halonen. <i>Annals of Internal Medicine</i> . 2010;153(11):703-9            | No | No | Cardiac Surgery                       |
| Foex. <i>Anesthesiology</i> . 2010;113(4):767-71                            | No | No | Review                                |
| Wallace. <i>Anesthesiology</i> . 2010;113(4):794-805                        | No | No | Review                                |
| Shukla. <i>Internet Journal of Anesthesiology</i> . 2010;25(1):1            | No | No | On anaesthetic or opioid requirements |
| Stephens. <i>Critical Care Nursing</i> . 2010;22(2):209-15                  | No | No | Review                                |
| Koi. <i>Current Therapeutic Research</i> . 2009;70(3):197-208               | No | No | Not a RCT of beta blocker vs control  |
| Alper. <i>Advisor for Nurse Practitioners</i> . 2009;12(4):72               | No | No | Review                                |
| McColl. <i>ACP Journal Club</i> . 2009;150(3):2                             | No | No | Review                                |
| Mui. <i>Journal of Clinical Outcomes Management</i> . 2008;15(10):470-1     | No | No | Review                                |
| Turan. <i>Internet Journal of Anesthesiology</i> . 2008;17(2):7             | No | No | Not a RCT of beta blocker vs control  |
| Mullett. <i>RN</i> . 2008;71(6):23                                          | No | No | Review                                |
| Flood. <i>American Family Physician</i> . 2007;75(5):656-85                 | No | No | Review                                |
| Mason. <i>AANA Journal</i> . 2006;74(2):113-7                               | No | No | Review                                |
| Fleisher. <i>Current Reviews for Nurse Anesthetists</i> '. 2004;27(6):63-70 | No | No | Review                                |
| Martinez. <i>Journal of Critical Care</i> . 2002;17(2):105-13               | No | No | Review                                |
| Kuro. <i>Anesthesia and Resuscitation</i> . 2002;36(3):145-155              | No | No | Cardiac Surgery                       |



### Appendix 3

In the trial by Mangano and colleagues, only the post discharge 2- year mortality is reported, so the Kaplan Meier survival curve was used to obtain the post discharge 30-day mortality; 3 deaths occurred in the control group, and 0 deaths in the beta-blocker group. This was added to the in-hospital mortality data to give the all-cause 30-day mortality. Vertical line =30 days.

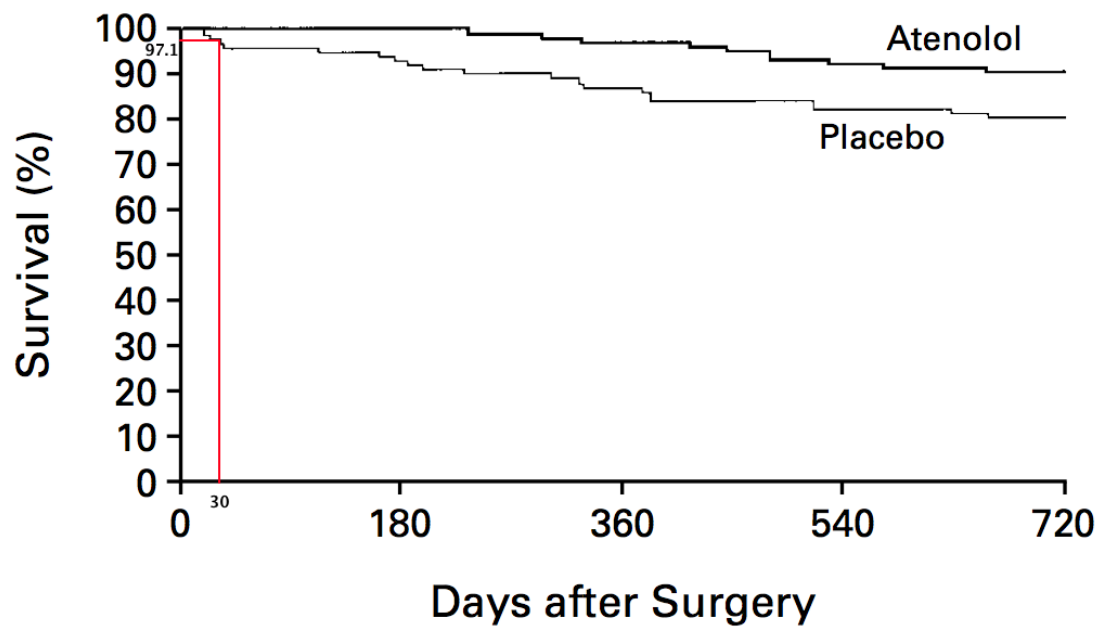

Figure extracted from Mangano *N Engl J Med.* 1996;335(23):1713-20

### Appendix 4

Publication bias assessment using funnel plot

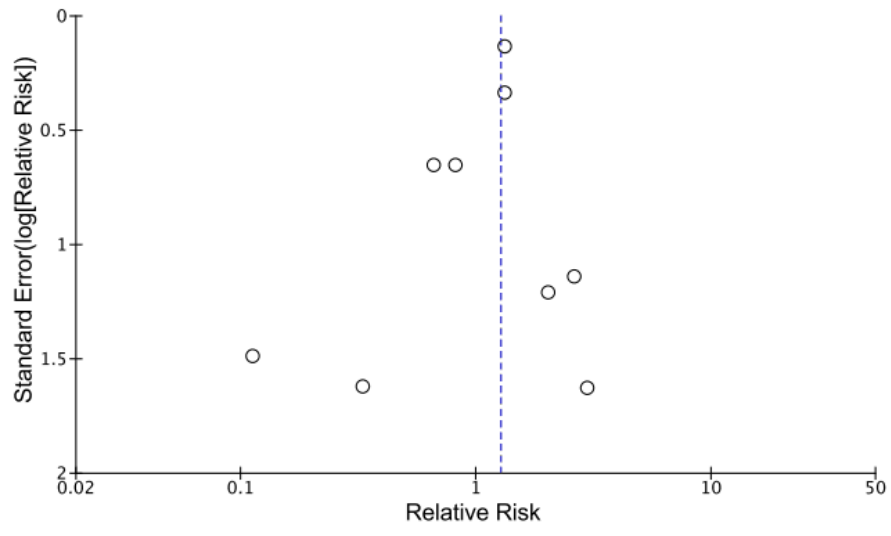

Supplement: heartjnl-2013-304262-s1.pdf [file heartjnl-2013-304262-s1.pdf]
